# Supplementary material for: Enhanced Wound Healing Potential of Primary Human Oral Fibroblasts and Periodontal Ligament Cells Cultured on Four Different Porcine-Derived Collagen Matrices
Source: PubMed Central journal article supplement (PMC7504420; doi:10.3390/ma13173819), 2020-08-29
Supplement: materials-13-03819-s001.pdf [file materials-13-03819-s001.pdf]

*Supplementary materials*

# **Enhanced Wound Healing Potential of Primary Human Oral Fibroblasts and Periodontal Ligament Cells Cultured on Four Different Porcine-Derived Collagen Matrices**

**Zhikai Lin** <sup>1,2,3,†</sup>, **Cristina Nica** <sup>1,2,†</sup>, **Anton Sculean** <sup>2,‡</sup> and **Maria B. Asparuhova** <sup>1,2,\*,‡</sup>

<sup>1</sup> Laboratory of Oral Cell Biology, Dental Research Center, School of Dental Medicine, University of Bern, Freiburgstrasse 3, 3010 Bern, Switzerland; zhikai.lin@zmk.unibe.ch (Z.L.); cristina-gabriela.nica@students.unibe.ch (C.N.)

<sup>2</sup> Department of Periodontology, School of Dental Medicine, University of Bern, Freiburgstrasse 7, 3010 Bern, Switzerland; anton.sculean@zmk.unibe.ch

<sup>3</sup> Department of Periodontology, Shanghai Ninth People's Hospital, School of Medicine, Shanghai Jiaotong University, Zhizaoju Road 639, Shanghai 200011, China

\* Correspondence: mariya.asparuhova@zmk.unibe.ch; Tel.: +41-31-632-86-22

† Equal contribution.

‡ These authors share senior authorship.

Received: 27 July 2020; Accepted: 26 August 2020; Published: date

**Table S1.** Primer sequences for proliferative marker genes.

| Gene symbol | Primer pair (fwd/rev)          |
|-------------|--------------------------------|
| MYBL2       | 5' -GTCAAATGGACCCATGAGGA-3'    |
|             | 5' -GTCAGTGC GGTTAGGGAAGT-3'   |
| BUB1        | 5' -GGAGAACGCTCTGTCAGCA-3'     |
|             | 5' -TCCAAAACTCTTCAGCATGAG-3'   |
| PLK1        | 5' -AACCGAGTTATTCATCGAGACC-3'  |
|             | 5' -TTGGTTGCCAGTCCAAAATC-3'    |
| MKI67       | 5' -GAGGTGTGCAGAAAATCCAAA-3'   |
|             | 5' -CTGTCCCTATGACTTCTGGTTGT-3' |
| PCNA        | 5' -ACACTAAGGGCCGAAGATAACG-3'  |
|             | 5' -ACAGCATCTCCAATATGGCTGA-3'  |
| CCNE1       | 5' -GGCCAAAATCGACAGGAC-3'      |
|             | 5' -GGGTCTGCACAGACTGCAT-3'     |
| CCND1       | 5' -GCCGAGAAGCTGTGCATC-3'      |
|             | 5' -CCACTTGAGCTTGTTACCA-3'     |
| CCNB1       | 5' -CCTCCGGTGTCTGCTTC-3'       |
|             | 5' -TTCAGCATTAATTTTCGAGTTCC-3' |
| GAPDH*      | 5' -ATCAAGAAGTGGTGAAGCAG-3'    |
|             | 5' -TCGTTGTCATACCAGGAAATGAG-3' |

\*reference gene used for normalization in all qPCR analyses

**Table S2.** Primer sequences for adhesive marker genes.

| Gene symbol | Primer pair (fwd/rev)          |
|-------------|--------------------------------|
| FN1         | 5' -TGCAGGTCCAGATCAAACAG-3'    |
|             | 5' -TCCACATCAGTGAATGCCAG-3'    |
| VCL         | 5' -ATGGGTCAAGGGGCATCCT-3'     |
|             | 5' -GGCCCAAGATTCTTTGTGTAAGT-3' |

|       |                                 |
|-------|---------------------------------|
| CD44  | 5' -CAGCACCATTTCAACCACAC-3'     |
|       | 5' -CATTTCTGTCTACATCAGTCATCC-3' |
| ICAM1 | 5' -CCTTCCTCACCGTGTACTGG-3'     |
|       | 5' -AGCGTAGGGTAAGGTTCTTGC-3'    |

---

**Table S3.** Primer sequences for wound healing-related genes.

| Gene symbol | Primer pair (fwd/rev)           |
|-------------|---------------------------------|
| TGFB1       | 5' -AACCCACAACGAAATCTATGAC-3'   |
|             | 5' -GGAATTGTTGCTGTATTTCTGG-3'   |
| FGF2        | 5' -ACATCAAGCTACAACCTCAAGC-3'   |
|             | 5' -CCGTAACACATTTAGAAGCCAG-3'   |
| VEGFA       | 5' -ACTGAGGAGTCCAACATCAC-3'     |
|             | 5' -TCTTTCTTTGGTCTGCATTCAC-3'   |
| EGF         | 5' -AAGATATACTTTGCCCATACAGCC-3' |
|             | 5' -AGAGATTTCCCTCTGTCTGTCC-3'   |
| MMP1        | 5' -TAAAGACAGATTCTACATGCGCAC-3' |
|             | 5' -AACAGCCCAGTACTTATTCCCT-3'   |
| MMP14       | 5' -TCAAAGGAGACAAGCATTGGG-3'    |
|             | 5' -CGGTAGTACTTGTTTCCACGG-3'    |
| MMP3        | 5' -TTTGCAGTTAGAGAACATGGAG-3'   |
|             | 5' -ACGAGAAATAAATTGGTCCCTG-3'   |
| MMP10       | 5' -TGCAGTTAAAGAACATGGAGAC-3'   |
|             | 5' -CGAGGAATAAATTGGTGCCTG-3'    |
